# Supplementary material
Source: MDPI journal article supplement (https://www.mdpi.com/2072-4292/6/10/10089)

*Supplementary Information*

## **Global Retrieval of Diatom Abundance Based on Phytoplankton Pigments and Satellite Data. *Remote Sensing*, 2014, 10, 10089–10106**

**Mariana A. Soppa<sup>1,\*</sup>, Takafumi Hirata<sup>2,3</sup>, Brenner Silva<sup>4</sup>, Tilman Dinter<sup>1,5</sup>, Ilka Peeken<sup>1,6</sup>, Sonja Wiegmann<sup>1</sup> and Astrid Bracher<sup>1,5</sup>**

<sup>1</sup> Alfred-Wegener-Institute Helmholtz Center for Polar and Marine Research, Am Handelshafen 12, D-27570 Bremerhaven, Germany; E-Mails: Ilka.Peeken@awi.de (I.P.); Sonja.Wiegmann@awi.de (S.W.); Astrid.Bracher@awi.de (A.B.)

<sup>2</sup> Faculty of Environmental Earth Science, Hokkaido University, N10W5, Kita-Ku, Sapporo 060-0810, Japan; E-Mail: tahi@ees.hokudai.ac.jp

<sup>3</sup> CREST, Japan Science and Technology Agency, N10W5, Kita-Ku, Sapporo 060-0810, Japan

<sup>4</sup> Laboratory for Climatology and Remote Sensing, Philipps-Universität Marburg, Deutschhausstr. 12, D-35037 Marburg, Germany; E-Mail: silvab@staff.uni-marburg.de

<sup>5</sup> Institute of Environmental Physics, University of Bremen, Otto-Hahn-Allee 1, D-28359 Bremen, Germany; E-Mail: dinter@iup.physik.uni-bremen.de

<sup>6</sup> MARUM-Center for Marine Environmental Sciences, Leobener Str., D-28359 Bremen, Germany

\* Author to whom correspondence should be addressed; E-Mail: msoppa@awi.de; Tel.: +49-471-4831-1785; Fax: +49-471-4831-1149.

---

**Figure S1.** Scatterplot of the validation for the global DP<sub>Zpd</sub> data set (N = 1182) (a) new model (ABA<sub>Zpd</sub>), (b) model of Hirata *et al.* [1] parameterized with the DP<sub>Zpd</sub> data set (ABA\*) and (c) original model and fitting parameters of Hirata *et al.* [1] (ABA\*\*). The samples located in the SO are presented in grey (N = 460), together with the statistics of the validation. The red line represents the 1:1 line. The statistics were calculated with log<sub>10</sub> transformed data (e.g., log<sub>10</sub>(y + 0.00003)).

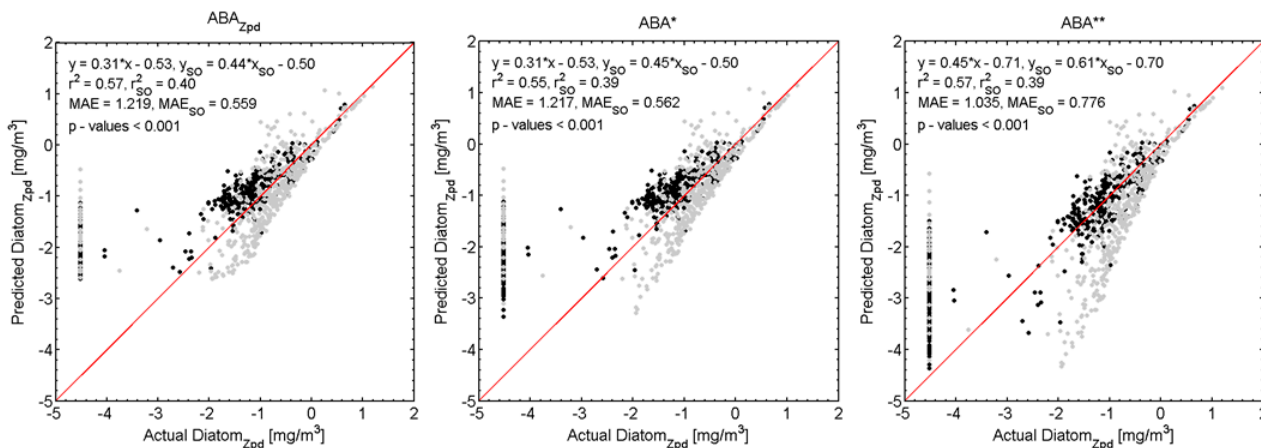

**Figure S2.** On the left: relationship between TChla<sub>Zpd</sub> and Diatom<sub>Zpd</sub> in the SO with the fit function plotted in blue (log<sub>10</sub> transformed data). On the right: validation calculated with both log<sub>10</sub> transformed data (e.g., log<sub>10</sub>(y + 0.00003)). The red line represents the 1:1 line.

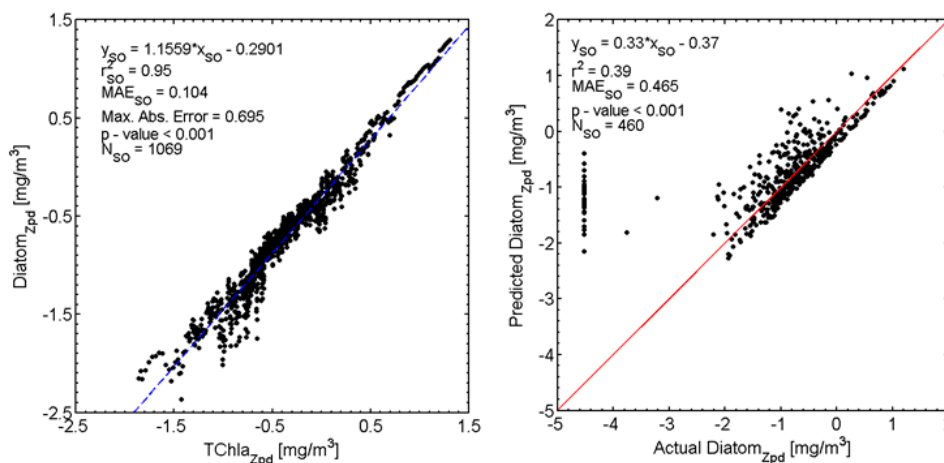

**Figure S3.** Climatology of TChla<sub>Z<sub>pd</sub></sub> of diatoms (mg/m<sup>3</sup>) using the regional algorithm for the SO based on 2003–2013 period. The austral winter months of May, June, July and August are not presented due to too few number observations available in these months. White areas correspond to waters with depths shallower than 200 m or without satellite information.

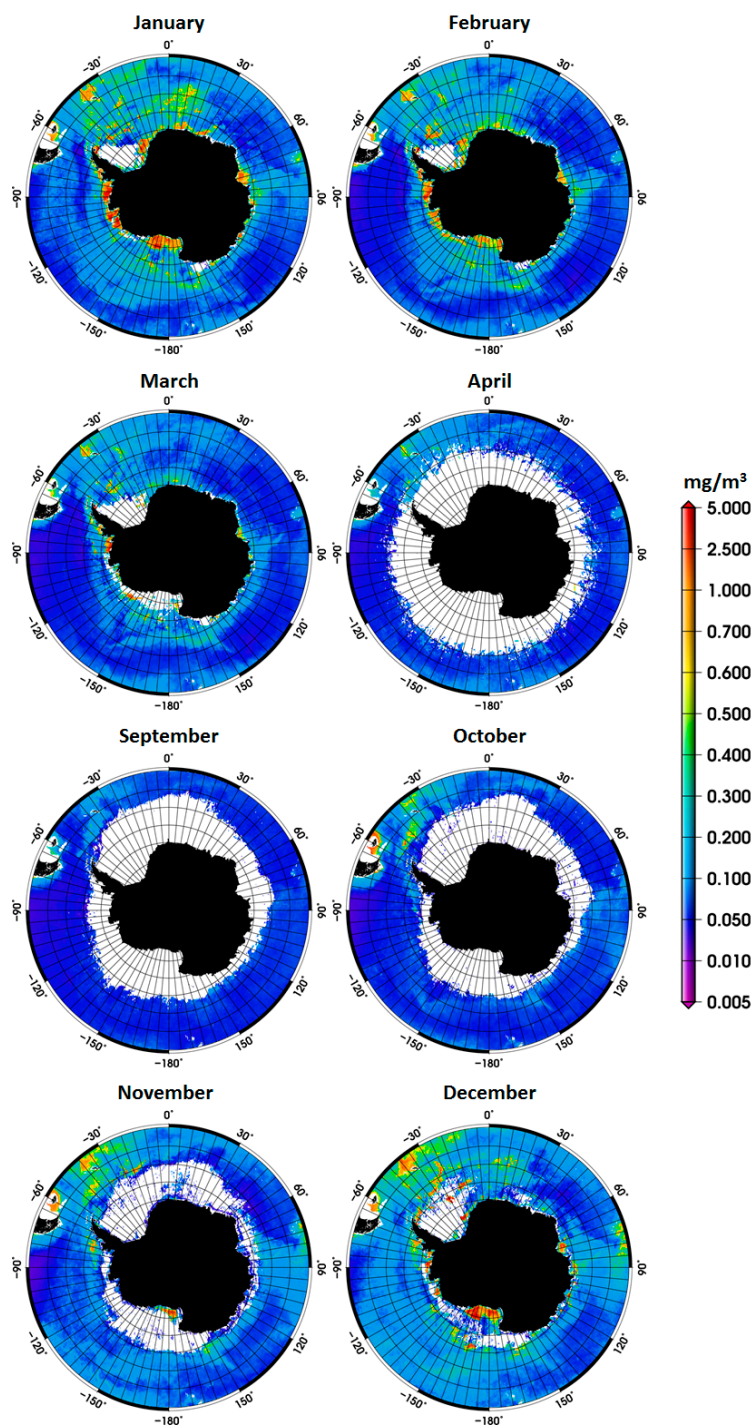

Supplement: s1 [file s1]
